# Supplementary material for: All-solid-state lithium secondary batteries with metal-sulfide-coated LiCoO2 prepared by thermal decomposition of dithiocarbamato complexes
Source: Royal Society of Chemistry journal article supplement (doi:10.1039/c2jm32490c), 2012-01-01
Supplement: c2jm32490c.pdf [file c2jm32490c.pdf]

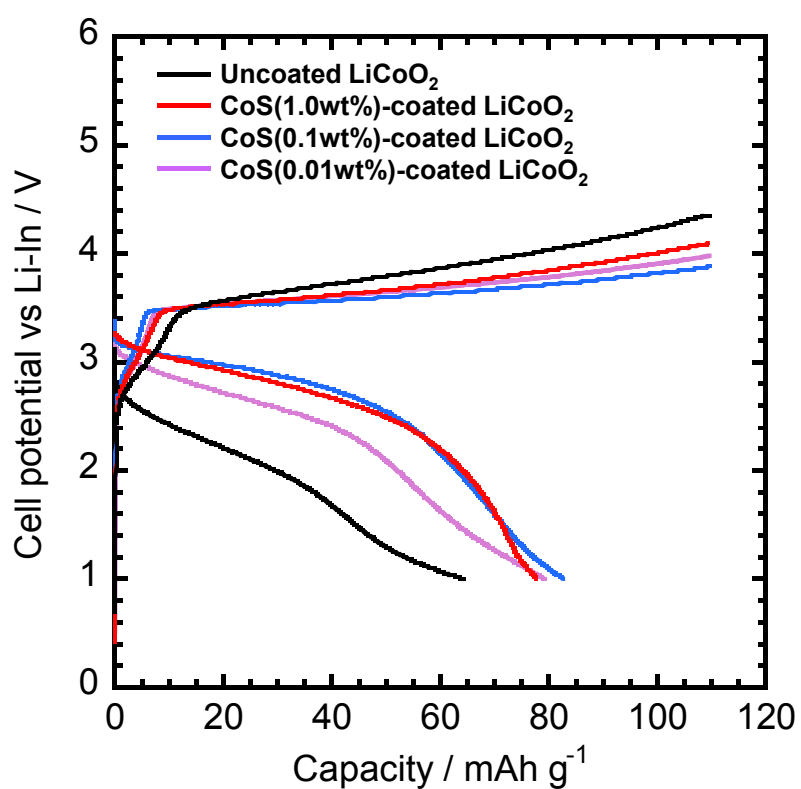

Fig. S1 Charge-discharge curves of all-solid-state cells In/80Li<sub>2</sub>S·20P<sub>2</sub>S<sub>5</sub> glass-ceramic/LiCoO<sub>2</sub> using uncoated and 0.01, 0.1, and 1 wt.% CoS-coated LiCoO<sub>2</sub>. The current density was 1.3 mA cm<sup>-2</sup>.
